# Supplementary material for: Theoretical study of laser cooling of the TlF+ molecular ion
Source: Royal Society of Chemistry journal article supplement (doi:10.1039/d0cp05575a), 2020-12-16
Supplement: d0cp05575a1.pdf [file d0cp05575a1.pdf]

Table S1: Calculated spectroscopic constants for  $X^2\Sigma^+$ ,  $1^2\Pi$ ,  $(2)^2\Sigma^+$ ,  $(2)^2\Pi$ ,  $(1)1/2$  and  $(4)1/2$  low-lying states of  $TlF^+$  molecule using different basis sets.

| state           | $T_e$<br>( $\text{cm}^{-1}$ ) | $R_e$<br>( $\text{\AA}$ ) | $\omega_e$<br>( $\text{cm}^{-1}$ ) | $B_e$<br>( $\text{cm}^{-1}$ ) | $D_0(\text{ev})$ | Ref.      | Method            | Tl basis      | F basis      |
|-----------------|-------------------------------|---------------------------|------------------------------------|-------------------------------|------------------|-----------|-------------------|---------------|--------------|
| $X^2\Sigma^+$   | 0.0                           | 2.029                     | 381.44                             | 0.2355                        | 0.180            | This work | MRCI/core,2,0,0,0 | ECP68MWB_AVQZ | AVQZ         |
|                 | 0.0                           | 2.060                     | 372.08                             | 0.2283                        | 0.077            | This work | MRCI/core 6,2,2,1 | ECP60MDF_AV5Z | AVQZ         |
|                 | 0.0                           | 2.159                     | 149.50                             | 0.2050                        |                  | This work | MRCI/core 4,1,1,0 | ECP60MDF_AV5Z | AVQZ         |
|                 | 0.0                           | 2.022                     | 386.60                             | 0.2371                        | 0.207            | This work | MRCI/core 1,0,0,0 | ECP68MWB_AVQZ | ECP2MWB_AVQZ |
|                 | 0.0                           | 2.050                     | 349.00                             |                               | 0.020            | [34]      | MR-AQCC           | ECP60MDF      | AVQZ         |
|                 |                               |                           |                                    |                               | 0.160            | [33]      | Experimental      |               |              |
| $(1)1/2$        | 0.0                           | 2.018                     | 399.40                             | 0.2381                        |                  | This work | MRCI/core,2,0,0,0 | ECP68MWB_AVQZ | AVQZ         |
|                 | 0.0                           | 2.012                     | 404.44                             | 0.2395                        |                  | This work | MRCI/core 1,0,0,0 | ECP68MWB_AVQZ | ECP2MWB_AVQZ |
| $(1)^2\Pi$      | 456.20                        | 3.123                     | 71.76                              | 0.0993                        | 0.086            | This work | MRCI/core,2,0,0,0 | ECP68MWB_AVQZ | AVQZ         |
|                 | 559.23                        | 3.093                     | 75.18                              | 0.1013                        | 0.098            | This work | MRCI/core 1,0,0,0 | ECP68MWB_AVQZ | ECP2MWB_AVQZ |
| $(2)^2\Sigma^+$ | 30329.79                      | 2.182                     | 538.10                             | 0.2035                        | 3.347            | This work | MRCI/core,2,0,0,0 | ECP68MWB_AVQZ | AVQZ         |
|                 | 26550.47                      | 2.247                     | 481.29                             | 0.1919                        | 3.092            | This work | MRCI/core 6,2,2,1 | ECP60MDF_AV5Z | AVQZ         |
|                 | 30079.84                      | 2.165                     | 597.04                             | 0.2068                        |                  | This work | MRCI/core 4,1,1,0 | ECP60MDF_AV5Z | AVQZ         |
|                 | 30255.99                      | 2.178                     | 540.72                             | 0.2043                        | 3.38             | This work | MRCI/core 1,0,0,0 | ECP68MWB_AVQZ | ECP2MWB_AVQZ |
|                 | 29440.00                      | 2.200                     | 517.00                             |                               |                  | [34]      | MR-AQCC           | ECP60MDF      | AVQZ         |
| $(2)^2\Pi$      | 53277.73                      | 2.018                     | 411.52                             | 0.2382                        | 0.512            | This work | MRCI/core,2,0,0,0 | ECP68MWB_AVQZ | AVQZ         |
|                 | 49760.53                      | 2.102                     | 340.51                             | 0.2195                        | 0.216            | This work | MRCI/core 6,2,2,1 | ECP60MDF_AV5Z | AVQZ         |
|                 | 52412.41                      | 2.056                     | 347.91                             | 0.2293                        |                  | This work | MRCI/core 4,1,1,0 | ECP60MDF_AV5Z | AVQZ         |
|                 | 53272.90                      | 2.013                     | 413.31                             | 0.2392                        | 0.538            | This work | MRCI/core 1,0,0,0 | ECP68MWB_AVQZ | ECP2MWB_AVQZ |
| $(4)1/2$        | 48586.12                      | 2.013                     | 437.85                             | 0.2393                        |                  | This work | MRCI/core,2,0,0,0 | ECP68MWB_AVQZ | AVQZ         |
|                 | 48574.61                      | 2.008                     | 439.06                             | 0.2403                        |                  | This work | MRCI/core 1,0,0,0 | ECP68MWB_AVQZ | ECP2MWB_AVQZ |

Table S2: Values of the vibrational energies  $E_v$ , the rotational constants  $B_v$ , the centrifugal distortion constant  $D_v$  and the abscissas of the turning points for the different vibrational levels of spin free states,  $X^2\Sigma^+$ ,  $(2)^2\Sigma^+$ ,  $(1)^2\Pi$  and  $(2)^2\Pi$ , of  $\text{TlF}^+$ .

[Tl<sup>+</sup>: ECP68MWB\_AVQZ, F: all-electron aug-cc-pVQZ].

| $X^2\Sigma^+$   |                                  |                           |                           |                |                |
|-----------------|----------------------------------|---------------------------|---------------------------|----------------|----------------|
| $\nu$           | $E_v$ (cm <sup>-1</sup> )        | $B_v$ (cm <sup>-1</sup> ) | $D_v$ (cm <sup>-1</sup> ) | $R_{\min}$ (Å) | $R_{\max}$ (Å) |
| 0               | 186.02<br>173.00 <sup>[34]</sup> | 0.2328                    | 3.9409(-7)                | 1.965          | 2.110          |
| 1               | 535.50<br>479.00 <sup>[34]</sup> | 0.2266                    | 4.8723(-7)                | 1.928          | 2.189          |
| 2               | 849.54<br>733.00 <sup>[34]</sup> | 0.2193                    | 6.3232(-7)                | 1.906          | 2.259          |
| 3               | 1124.21                          | 0.2105                    | 8.7127(-7)                | 1.891          | 2.334          |
| 4               | 1355.21                          | 0.1995                    | 1.2947(-6)                | 1.880          | 2.421          |
| 5               | 1538.24                          | 0.1852                    | 2.1364(-6)                | 1.872          | 2.531          |
| 6               | 1669.19                          | 0.1652                    | 4.8065(-6)                | 1.867          | 2.689          |
| 7               | 1732.40                          | 0.1132                    | 2.7945(-5)                | 1.864          | 3.392          |
| $(1)^2\Pi$      |                                  |                           |                           |                |                |
| $\nu$           | $E_v$ (cm <sup>-1</sup> )        | $B_v$ (cm <sup>-1</sup> ) | $D_v$ (cm <sup>-1</sup> ) | $R_{\min}$ (Å) | $R_{\max}$ (Å) |
| 0               | 36.06                            | 0.0982                    | 7.4418(-7)                | 2.977          | 3.306          |
| 1               | 106.44                           | 0.0961                    | 8.0782(-7)                | 2.882          | 3.459          |
| 2               | 172.82                           | 0.0932                    | 9.5702(-7)                | 2.825          | 3.595          |
| 3               | 233.87                           | 0.0903                    | 9.5244(-7)                | 2.783          | 3.722          |
| 4               | 290.79                           | 0.0868                    | 1.1649(-6)                | 2.752          | 3.852          |
| 5               | 342.29                           | 0.0829                    | 1.3071(-6)                | 2.728          | 3.996          |
| 6               | 388.32                           | 0.0785                    | 1.4099(-6)                | 2.709          | 4.145          |
| 7               | 429.37                           | 0.0743                    | 1.6620(-6)                | 2.693          | 4.319          |
| 8               | 465.58                           | 0.0702                    | 1.2808(-6)                | 2.680          | 4.486          |
| 9               | 499.24                           | 0.0677                    | 1.3217(-6)                | 2.669          | 4.642          |
| 10              | 530.43                           | 0.0637                    | 1.7136(-6)                | 2.659          | 4.826          |
| 11              | 558.40                           | 0.0606                    | 1.2198(-6)                | 2.651          | 4.998          |
| 12              | 584.70                           | 0.0580                    | 1.5986(-6)                | 2.643          | 5.173          |
| 13              | 608.76                           | 0.0545                    | 1.9696(-6)                | 2.636          | 5.366          |
| 14              | 629.90                           | 0.0503                    | 2.5835(-6)                | 2.630          | 5.607          |
| 15              | 647.70                           | 0.0460                    | 2.4114(-6)                | 2.626          | 5.887          |
| $(2)^2\Sigma^+$ |                                  |                           |                           |                |                |
| $\nu$           | $E_v$ (cm <sup>-1</sup> )        | $B_v$ (cm <sup>-1</sup> ) | $D_v$ (cm <sup>-1</sup> ) | $R_{\min}$ (Å) | $R_{\max}$ (Å) |
| 0               | 268.32                           | 0.2032                    | 1.1723(-7)                | 2.124          | 2.244          |
| 1               | 802.61                           | 0.2026                    | 1.1862(-7)                | 2.084          | 2.293          |

|    |          |        |            |       |       |
|----|----------|--------|------------|-------|-------|
| 2  | 1333.16  | 0.2020 | 1.1996(-7) | 2.057 | 2.327 |
| 3  | 1859.96  | 0.2013 | 1.2124(-7) | 2.036 | 2.356 |
| 4  | 2383.04  | 0.2007 | 1.2248(-7) | 2.018 | 2.383 |
| 5  | 2902.40  | 0.2000 | 1.2365(-7) | 2.002 | 2.407 |
| 6  | 3418.06  | 0.1993 | 1.2478(-7) | 1.988 | 2.429 |
| 7  | 3930.03  | 0.1986 | 1.2584(-7) | 1.975 | 2.450 |
| 8  | 4438.33  | 0.1979 | 1.2688(-7) | 1.963 | 2.471 |
| 9  | 4942.98  | 0.1972 | 1.2802(-7) | 1.952 | 2.491 |
| 10 | 5443.95  | 0.1964 | 1.2915(-7) | 1.942 | 2.510 |
| 11 | 5941.20  | 0.1957 | 1.3001(-7) | 1.932 | 2.528 |
| 12 | 6434.78  | 0.1949 | 1.3082(-7) | 1.923 | 2.547 |
| 13 | 6924.72  | 0.1941 | 1.3187(-7) | 1.915 | 2.564 |
| 14 | 7411.00  | 0.1934 | 1.3280(-7) | 1.907 | 2.582 |
| 15 | 7893.61  | 0.1926 | 1.3358(-7) | 1.899 | 2.599 |
| 16 | 8372.57  | 0.1918 | 1.3451(-7) | 1.891 | 2.616 |
| 17 | 8847.88  | 0.1910 | 1.3540(-7) | 1.884 | 2.633 |
| 18 | 9319.53  | 0.1901 | 1.3621(-7) | 1.877 | 2.650 |
| 19 | 9787.52  | 0.1893 | 1.3707(-7) | 1.871 | 2.667 |
| 20 | 10251.84 | 0.1884 | 1.3791(-7) | 1.865 | 2.683 |
| 21 | 10712.50 | 0.1876 | 1.3875(-7) | 1.859 | 2.699 |
| 22 | 11169.49 | 0.1867 | 1.3959(-7) | 1.853 | 2.716 |
| 23 | 11622.80 | 0.1859 | 1.4043(-7) | 1.847 | 2.732 |
| 24 | 12072.42 | 0.1850 | 1.4126(-7) | 1.842 | 2.748 |
| 25 | 12518.35 | 0.1841 | 1.4208(-7) | 1.836 | 2.764 |
| 26 | 12960.58 | 0.1832 | 1.4299(-7) | 1.831 | 2.780 |
| 27 | 13399.10 | 0.1823 | 1.4399(-7) | 1.826 | 2.796 |
| 28 | 13833.88 | 0.1814 | 1.4507(-7) | 1.821 | 2.813 |
| 29 | 14264.89 | 0.1804 | 1.4608(-7) | 1.817 | 2.829 |
| 30 | 14692.10 | 0.1795 | 1.4703(-7) | 1.812 | 2.845 |
| 31 | 15115.51 | 0.1785 | 1.4798(-7) | 1.808 | 2.861 |
| 32 | 15535.09 | 0.1776 | 1.4898(-7) | 1.803 | 2.877 |
| 33 | 15950.84 | 0.1766 | 1.5006(-7) | 1.799 | 2.893 |
| 34 | 16362.72 | 0.1756 | 1.5129(-7) | 1.795 | 2.910 |
| 35 | 16770.71 | 0.1746 | 1.5266(-7) | 1.791 | 2.926 |
| 36 | 17174.75 | 0.1736 | 1.5427(-7) | 1.787 | 2.942 |
| 37 | 17574.79 | 0.1726 | 1.5615(-7) | 1.784 | 2.959 |
| 38 | 17970.75 | 0.1715 | 1.5817(-7) | 1.780 | 2.976 |
| 39 | 18362.55 | 0.1705 | 1.6028(-7) | 1.776 | 2.992 |
| 40 | 18750.11 | 0.1694 | 1.6257(-7) | 1.773 | 3.009 |
| 41 | 19133.33 | 0.1682 | 1.6503(-7) | 1.770 | 3.026 |
| 42 | 19512.12 | 0.1671 | 1.6750(-7) | 1.766 | 3.044 |
| 43 | 19886.40 | 0.1659 | 1.6996(-7) | 1.763 | 3.061 |
| 44 | 20256.08 | 0.1647 | 1.7334(-7) | 1.760 | 3.079 |
| 45 | 20621.02 | 0.1635 | 1.7850(-7) | 1.757 | 3.097 |
| 46 | 20980.99 | 0.1622 | 1.8383(-7) | 1.754 | 3.116 |
| 47 | 21335.77 | 0.1609 | 1.8795(-7) | 1.751 | 3.134 |

| 48                 | 21685.19                    | 0.1595                      | 1.9397(-7)                  | 1.748          | 3.153          |
|--------------------|-----------------------------|-----------------------------|-----------------------------|----------------|----------------|
| 49                 | 22029.02                    | 0.1581                      | 2.0265(-7)                  | 1.745          | 3.173          |
| 50                 | 22366.89                    | 0.1565                      | 2.1021(-7)                  | 1.743          | 3.193          |
| 51                 | 22698.51                    | 0.1549                      | 2.2096(-7)                  | 1.740          | 3.214          |
| 52                 | 23023.44                    | 0.1532                      | 2.3517(-7)                  | 1.738          | 3.236          |
| 53                 | 23341.11                    | 0.1514                      | 2.4685(-7)                  | 1.735          | 3.259          |
| 54                 | 23651.12                    | 0.1494                      | 2.6343(-7)                  | 1.733          | 3.282          |
| 55                 | 23952.87                    | 0.1473                      | 2.8371(-7)                  | 1.731          | 3.307          |
| 56                 | 24245.63                    | 0.1450                      | 3.0841(-7)                  | 1.729          | 3.334          |
| 57                 | 24528.60                    | 0.1425                      | 3.3365(-7)                  | 1.727          | 3.362          |
| 58                 | 24800.97                    | 0.1397                      | 3.6886(-7)                  | 1.725          | 3.393          |
| (2) <sup>2</sup> Π |                             |                             |                             |                |                |
| $\nu$              | $E_\nu$ (cm <sup>-1</sup> ) | $B_\nu$ (cm <sup>-1</sup> ) | $D_\nu$ (cm <sup>-1</sup> ) | $R_{\min}$ (Å) | $R_{\max}$ (Å) |
| 0                  | 203.61                      | 0.2363                      | 3.2833(-7)                  | 1.955          | 2.093          |
| 1                  | 599.59                      | 0.2325                      | 3.4835(-7)                  | 1.915          | 2.159          |
| 2                  | 979.91                      | 0.2286                      | 3.7042(-7)                  | 1.891          | 2.211          |
| 3                  | 1344.47                     | 0.2246                      | 3.9474(-7)                  | 1.873          | 2.258          |
| 4                  | 1693.16                     | 0.2204                      | 4.2194(-7)                  | 1.858          | 2.304          |
| 5                  | 2025.88                     | 0.2161                      | 4.5252(-7)                  | 1.846          | 2.348          |
| 6                  | 2342.48                     | 0.2116                      | 4.8906(-7)                  | 1.836          | 2.393          |
| 7                  | 2642.63                     | 0.2069                      | 5.3791(-7)                  | 1.827          | 2.438          |
| 8                  | 2925.54                     | 0.2018                      | 5.8789(-7)                  | 1.819          | 2.486          |
| 9                  | 3191.21                     | 0.1968                      | 6.0235(-7)                  | 1.812          | 2.534          |
| 10                 | 3441.60                     | 0.1918                      | 6.7747(-7)                  | 1.806          | 2.584          |
| 11                 | 3675.59                     | 0.1860                      | 7.5762(-7)                  | 1.800          | 2.637          |
| 12                 | 3892.90                     | 0.1807                      | 7.5137(-7)                  | 1.796          | 2.694          |
| 13                 | 4096.45                     | 0.1757                      | 6.2805(-7)                  | 1.791          | 2.753          |
| 14                 | 4197.07                     | 0.0505                      | 9.3407(-7)                  | 1.789          | 2.782          |
| 15                 | 4219.70                     | 0.0479                      | 1.0335(-6)                  | 1.788          | 2.787          |

Note: Figures in parentheses for 10 to the power.

Table S3: Values of the vibrational energies  $E_v$ , the rotational constants  $B_v$ , the centrifugal distortion constant  $D_v$ , and the abscissas of the turning points  $R_{min}$  and  $R_{max}$  for the different vibrational levels of spin-orbit states, (1)1/2, (1)3/2, (3)1/2, (4)1/2 and (2)3/2, of TlF<sup>+</sup>. [Tl<sup>+</sup>: ECP68MWB\_AVQZ, F: all-electron aug-cc-pVQZ].

| (1) 1/2 |                           |                           |                           |               |               |
|---------|---------------------------|---------------------------|---------------------------|---------------|---------------|
| $\nu$   | $E_v$ (cm <sup>-1</sup> ) | $B_v$ (cm <sup>-1</sup> ) | $D_v$ (cm <sup>-1</sup> ) | $R_{min}$ (Å) | $R_{max}$ (Å) |
| 0       | 195.11                    | 0.2355                    | 3.6785(-7)                | 1.956         | 2.097         |
| 1       | 564.06                    | 0.2298                    | 4.4436(-7)                | 1.918         | 2.172         |
| 2       | 899.54                    | 0.2232                    | 5.6000(-7)                | 1.896         | 2.238         |
| 3       | 1197.80                   | 0.2152                    | 7.4391(-7)                | 1.881         | 2.306         |
| 4       | 1454.60                   | 0.2054                    | 1.0560(-6)                | 1.869         | 2.383         |
| 5       | 1664.85                   | 0.1916                    | 1.3627(-6)                | 1.861         | 2.477         |
| (1) 3/2 |                           |                           |                           |               |               |
| $\nu$   | $E_v$ (cm <sup>-1</sup> ) | $B_v$ (cm <sup>-1</sup> ) | $D_v$ (cm <sup>-1</sup> ) | $R_{min}$ (Å) | $R_{max}$ (Å) |
| 0       | 35.49                     | 0.0983                    | 7.7731(-7)                | 2.973         | 3.305         |
| 1       | 104.25                    | 0.0959                    | 8.2210(-7)                | 2.881         | 3.466         |
| 2       | 169.48                    | 0.0932                    | 8.8981(-7)                | 2.825         | 3.598         |
| 3       | 230.65                    | 0.0901                    | 9.8687(-7)                | 2.785         | 3.726         |
| 4       | 287.25                    | 0.0867                    | 1.1184(-6)                | 2.754         | 3.856         |
| 5       | 338.82                    | 0.0828                    | 1.3082(-6)                | 2.730         | 3.996         |
| 6       | 384.79                    | 0.0782                    | 1.6972(-6)                | 2.711         | 4.136         |
| 7       | 423.77                    | 0.0717                    | 3.0004(-6)                | 2.696         | 4.299         |
| (3) 1/2 |                           |                           |                           |               |               |
| $\nu$   | $E_v$ (cm <sup>-1</sup> ) | $B_v$ (cm <sup>-1</sup> ) | $D_v$ (cm <sup>-1</sup> ) | $R_{min}$ (Å) | $R_{max}$ (Å) |
| 0       | 267.19                    | 0.2027                    | 1.1736(-7)                | 2.127         | 2.247         |
| 1       | 799.20                    | 0.2021                    | 1.1888(-7)                | 2.086         | 2.295         |
| 2       | 1327.28                   | 0.2015                    | 1.2036(-7)                | 2.059         | 2.330         |
| 3       | 1851.44                   | 0.2008                    | 1.2179(-7)                | 2.038         | 2.360         |
| 4       | 2371.67                   | 0.2002                    | 1.2315(-7)                | 2.020         | 2.386         |
| 5       | 2887.97                   | 0.1995                    | 1.2444(-7)                | 2.004         | 2.410         |
| 6       | 3400.35                   | 0.1988                    | 1.2574(-7)                | 1.990         | 2.433         |
| 7       | 3908.81                   | 0.1981                    | 1.2701(-7)                | 1.977         | 2.454         |
| 8       | 4413.32                   | 0.1974                    | 1.2817(-7)                | 1.965         | 2.475         |
| 9       | 4913.91                   | 0.1966                    | 1.2937(-7)                | 1.955         | 2.495         |
| 10      | 5410.56                   | 0.1959                    | 1.3051(-7)                | 1.944         | 2.514         |
| 11      | 5903.28                   | 0.1951                    | 1.3160(-7)                | 1.935         | 2.533         |
| 12      | 6392.07                   | 0.1943                    | 1.3270(-7)                | 1.926         | 2.551         |
| 13      | 6876.92                   | 0.1935                    | 1.3369(-7)                | 1.917         | 2.569         |
| 14      | 7357.85                   | 0.1927                    | 1.3469(-7)                | 1.909         | 2.587         |
| 15      | 7834.87                   | 0.1919                    | 1.3561(-7)                | 1.901         | 2.604         |
| 16      | 8307.98                   | 0.1911                    | 1.3649(-7)                | 1.894         | 2.622         |

|    |          |        |            |       |       |
|----|----------|--------|------------|-------|-------|
| 17 | 8777.21  | 0.1903 | 1.3723(-7) | 1.887 | 2.639 |
| 18 | 9242.60  | 0.1895 | 1.3791(-7) | 1.880 | 2.655 |
| 19 | 9704.17  | 0.1887 | 1.3840(-7) | 1.873 | 2.672 |
| 20 | 10162.00 | 0.1878 | 1.3871(-7) | 1.867 | 2.689 |
| 21 | 10616.14 | 0.1870 | 1.3873(-7) | 1.861 | 2.705 |
| 22 | 11066.72 | 0.1862 | 1.3838(-7) | 1.855 | 2.721 |
| 23 | 11513.87 | 0.1854 | 1.3749(-7) | 1.849 | 2.737 |
| 24 | 11957.77 | 0.1846 | 1.3590(-7) | 1.844 | 2.753 |
| 25 | 12398.70 | 0.1839 | 1.3340(-7) | 1.839 | 2.769 |
| 26 | 12836.97 | 0.1832 | 1.2985(-7) | 1.833 | 2.784 |
| 27 | 13273.01 | 0.1826 | 1.2521(-7) | 1.828 | 2.799 |
| 28 | 13707.30 | 0.1820 | 1.1976(-7) | 1.823 | 2.814 |
| 29 | 14140.39 | 0.1816 | 1.1425(-7) | 1.819 | 2.828 |
| 30 | 14572.77 | 0.1812 | 1.0998(-7) | 1.814 | 2.842 |
| 31 | 15004.78 | 0.1808 | 1.0881(-7) | 1.809 | 2.855 |
| 32 | 15436.43 | 0.1804 | 1.1299(-7) | 1.805 | 2.868 |
| 33 | 15867.24 | 0.1799 | 1.2504(-7) | 1.800 | 2.880 |
| 34 | 16296.04 | 0.1792 | 1.4749(-7) | 1.796 | 2.894 |
| 35 | 16720.78 | 0.1781 | 1.8155(-7) | 1.792 | 2.908 |
| 36 | 17138.61 | 0.1765 | 2.2241(-7) | 1.788 | 2.925 |
| 37 | 17546.41 | 0.1745 | 2.5128(-7) | 1.784 | 2.943 |
| 38 | 17942.41 | 0.1723 | 2.4342(-7) | 1.780 | 2.962 |
| 39 | 18327.77 | 0.1705 | 2.1242(-7) | 1.777 | 2.982 |
| 40 | 18705.12 | 0.1690 | 2.0578(-7) | 1.773 | 3.002 |

(4) 1/2

| $\nu$ | $E_\nu$ (cm <sup>-1</sup> ) | $B_\nu$ (cm <sup>-1</sup> ) | $D_\nu$ (cm <sup>-1</sup> ) | $R_{\min}$ (Å) | $R_{\max}$ (Å) |
|-------|-----------------------------|-----------------------------|-----------------------------|----------------|----------------|
| 0     | 216.95                      | 0.2376                      | 2.9198(-7)                  | 1.952          | 2.086          |
| 1     | 641.13                      | 0.2343                      | 3.0485(-7)                  | 1.913          | 2.148          |
| 2     | 1051.74                     | 0.2309                      | 3.1862(-7)                  | 1.889          | 2.196          |
| 3     | 1448.73                     | 0.2275                      | 3.3338(-7)                  | 1.870          | 2.240          |
| 4     | 1832.08                     | 0.2239                      | 3.4935(-7)                  | 1.856          | 2.281          |
| 5     | 2201.73                     | 0.2203                      | 3.6792(-7)                  | 1.843          | 2.320          |
| 6     | 2557.42                     | 0.2165                      | 3.9179(-7)                  | 1.833          | 2.359          |
| 7     | 2898.60                     | 0.2126                      | 4.1246(-7)                  | 1.823          | 2.399          |
| 8     | 3225.55                     | 0.2087                      | 4.0987(-7)                  | 1.815          | 2.438          |
| 9     | 3540.42                     | 0.2050                      | 4.3480(-7)                  | 1.808          | 2.477          |
| 10    | 3842.65                     | 0.2009                      | 4.7783(-7)                  | 1.801          | 2.517          |
| 11    | 4131.19                     | 0.1969                      | 4.6597(-7)                  | 1.795          | 2.558          |
| 12    | 4407.89                     | 0.1928                      | 5.2006(-7)                  | 1.789          | 2.599          |
| 13    | 4671.79                     | 0.1888                      | 4.9672(-7)                  | 1.784          | 2.641          |
| 14    | 4924.81                     | 0.1848                      | 5.2628(-7)                  | 1.780          | 2.684          |
| 15    | 5167.47                     | 0.1813                      | 4.6025(-7)                  | 1.775          | 2.727          |

(2) 3/2

|   |        |        |            |       |       |
|---|--------|--------|------------|-------|-------|
| 0 | 186.82 | 0.2330 | 3.7718(-7) | 1.966 | 2.110 |
| 1 | 547.49 | 0.2286 | 4.0892(-7) | 1.926 | 2.181 |

|   |         |        |            |       |       |
|---|---------|--------|------------|-------|-------|
| 2 | 889.99  | 0.2239 | 4.4497(-7) | 1.902 | 2.239 |
| 3 | 1214.14 | 0.2191 | 4.8723(-7) | 1.884 | 2.292 |
| 4 | 1519.63 | 0.2140 | 5.4187(-7) | 1.869 | 2.344 |
| 5 | 1805.68 | 0.2085 | 6.0528(-7) | 1.858 | 2.398 |
| 6 | 2072.04 | 0.2029 | 6.4246(-7) | 1.848 | 2.451 |
| 7 | 2320.58 | 0.1971 | 7.4617(-7) | 1.840 | 2.507 |
| 8 | 2508.37 | 0.0708 | 8.4258(-7) | 1.834 | 2.555 |
| 9 | 2548.64 | 0.0687 | 9.1126(-7) | 1.833 | 2.566 |

Note: Figures in parentheses for 10 to the power.

Table S4: Calculated FCFs of TlF<sup>+</sup> for the (2)<sup>2</sup>Π (ν') – X<sup>2</sup>Σ<sup>+</sup> (ν'') transition using different core potentials for Tl<sup>+</sup> and for the (2)<sup>2</sup>Π<sub>1/2</sub> (ν') – X<sup>2</sup>Σ<sup>+</sup><sub>1/2</sub> (ν'') transition using ECP60MDF for Tl<sup>+</sup>.

| [Tl <sup>+</sup> : ECP68MWB_AVQZ, F: all-electron aug-cc-pVQZ]                              |                 |                 |                 |           |          |          |
|---------------------------------------------------------------------------------------------|-----------------|-----------------|-----------------|-----------|----------|----------|
| (2) <sup>2</sup> Π (ν') – X <sup>2</sup> Σ <sup>+</sup> (ν'')                               |                 |                 |                 |           |          |          |
|                                                                                             | ν' = 0          | 1               | 2               | 3         | 4        | 5        |
| ν'' = 0                                                                                     | <b>9.77(-1)</b> | 2.20(-2)        | 7.32(-4)        | 7.15(-5)  | 8.26(-8) | 1.48(-7) |
| 1                                                                                           | 2.26(-2)        | <b>8.95(-1)</b> | 7.62(-2)        | 5.86(-3)  | 6.55(-4) | 1.39(-5) |
| 2                                                                                           | 2.45(-4)        | 7.98(-2)        | <b>7.13(-1)</b> | 1.75(-1)  | 2.77(-2) | 4.36(-3) |
| 3                                                                                           | 6.67(-6)        | 3.28(-3)        | 1.84(-1)        | 4.07(-1)  | 2.86(-1) | 9.23(-2) |
| 4                                                                                           | 3.38(-6)        | 1.25(-4)        | 2.27(-2)        | 2.86(-1)  | 8.46(-2) | 2.78(-1) |
| 5                                                                                           | 2.15(-6)        | 1.27(-5)        | 2.58(-3)        | 8.61(-2)  | 2.21(-1) | 1.62(-2) |
| [Tl <sup>+</sup> : ECP60MDF_AV5Z, F: all-electron aug-cc-pVQZ, MRCI/core,6,2,2,1]           |                 |                 |                 |           |          |          |
| (2) <sup>2</sup> Π (ν') – X <sup>2</sup> Σ <sup>+</sup> (ν'')                               |                 |                 |                 |           |          |          |
|                                                                                             | ν' = 0          | 1               | 2               | 3         | 4        | 5        |
| ν'' = 0                                                                                     | <b>8.89(-1)</b> | 9.37(-2)        | 1.46(-2)        | 2.44(-3)  | 3.54(-4) | 4.54(-5) |
| 1                                                                                           | 1.11(-1)        | <b>7.34(-1)</b> | 1.12(-1)        | 3.34(-2)  | 7.95(-3) | 1.95(-3) |
| 2                                                                                           | 5.20(-5)        | 1.70(-1)        | <b>6.75(-1)</b> | 9.04(-2)  | 4.82(-2) | 1.12(-2) |
| 3                                                                                           | 2.99(-4)        | 1.99(-3)        | 1.61(-1)        | 7.32(-1)  | 8.79(-3) |          |
| [Tl <sup>+</sup> : ECP60MDF_AV5Z, F: all-electron aug-cc-pVQZ, MRCI/core,6,2,2,1]           |                 |                 |                 |           |          |          |
| (2) <sup>2</sup> Π <sub>1/2</sub> (ν') – X <sup>2</sup> Σ <sup>+</sup> <sub>1/2</sub> (ν'') |                 |                 |                 |           |          |          |
|                                                                                             | ν' = 0          | 1               | 2               | 3         |          |          |
| ν'' = 0                                                                                     | <b>9.11(-1)</b> | 8.25(-2)        | 5.68(-2)        | 5.31(-4)  |          |          |
| 1                                                                                           | 8.56(-2)        | <b>7.41(-1)</b> | 1.35(-1)        | 2.78(-2)  |          |          |
| 2                                                                                           | 3.20(-3)        | 1.65(-1)        | 4.65(-1)        | 2.15 (-1) |          |          |
| 3                                                                                           | 4.41(-5)        | 1.12(-2)        | 3.45(-1)        | 1.50 (-1) |          |          |

Note: The figures in parentheses for 10 to the power.



Table S5: Calculated FCFs of TlF<sup>+</sup> for the (2)<sup>2</sup>Σ<sup>+</sup> – X<sup>2</sup>Σ<sup>+</sup> and (1)<sup>2</sup>Π – X<sup>2</sup>Σ<sup>+</sup> transitions.  
 [Tl<sup>+</sup>: ECP68MWB\_AVQZ, F: all-electron aug-cc-pVQZ].

| (2) <sup>2</sup> Σ <sup>+</sup> (ν') – X <sup>2</sup> Σ <sup>+</sup> (ν'') |           |           |           |           |           |           |
|----------------------------------------------------------------------------|-----------|-----------|-----------|-----------|-----------|-----------|
|                                                                            | ν' = 0    | 1         | 2         | 3         | 4         | 5         |
| ν'' = 0                                                                    | 1.21(-1)  | 1.57(-1)  | 1.70(-1)  | 1.52(-1)  | 1.24(-1)  | 9.32(-2)  |
| 1                                                                          | 4.75(-1)  | 8.26(-2)  | 1.37(-2)  | 5.24(-3)  | 3.06(-2)  | 5.84(-2)  |
| 2                                                                          | 3.66(-1)  | 2.01(-1)  | 4.69(-2)  | 7.94(-2)  | 5.89(-3)  | 6.73(-6)  |
| 3                                                                          | 5.63(-3)  | 4.47(-1)  | 1.73(-1)  | 2.32(-4)  | 1.31(-1)  | 3.40(-3)  |
| 4                                                                          | 2.45(-2)  | 1.33(-2)  | 2.69(-1)  | 1.82(-1)  | 2.57(-2)  | 2.12(-1)  |
| 5                                                                          | 3.04(-3)  | 2.96(-2)  | 1.57(-1)  | 1.10(-2)  | 4.86(-2)  | 1.00(-2)  |
| (1) <sup>2</sup> Π (ν') – X <sup>2</sup> Σ <sup>+</sup> (ν'')              |           |           |           |           |           |           |
|                                                                            | ν' = 0    | 1         | 2         | 3         | 4         | 5         |
| ν'' = 0                                                                    | 2.69(-19) | 3.86(-18) | 2.64(-17) | 1.17(-16) | 3.82(-16) | 9.76(-16) |
| 1                                                                          | 2.50(-16) | 3.21(-15) | 1.99(-14) | 8.15(-14) | 2.46(-13) | 5.88(-13) |
| 2                                                                          | 1.43(-13) | 1.60(-12) | 8.83(-12) | 3.24(-11) | 8.89(-11) | 1.95(-10) |
| 3                                                                          | 6.82(-11) | 6.34(-10) | 2.96(-9)  | 9.46(-9)  | 2.29(-8)  | 4.53(-8)  |
| 4                                                                          | 2.99(-8)  | 2.11(-7)  | 7.86 (-7) | 2.06(-6)  | 4.24(-6)  | 7.27 (-6) |
| 5                                                                          | 1.22(-5)  | 5.54(-5)  | 1.45(-5)  | 2.90 (-4) | 4.73(-4)  | 6.69(-4)  |

Note: Figures in parentheses for 10 to the power.

Table S6: Calculated FCFs corresponding to transitions between the vibrational levels of TIF<sup>+</sup> with (2)<sup>2</sup>Π (ν′ = 0, 1) and (2)<sup>2</sup>Π<sub>1/2</sub> (ν′ = 0, 1) as the higher levels to the levels of (2)<sup>2</sup>Σ<sup>+</sup>, (1)<sup>2</sup>Π and (2)<sup>2</sup>Σ<sup>+</sup><sub>1/2</sub>. [TI<sup>+</sup>: ECP68MWB\_AVQZ, F: all-electron aug-cc-pVQZ]

|        | (2) <sup>2</sup> Π(ν′) - (2) <sup>2</sup> Σ <sup>+</sup> (ν″) |          | (2) <sup>2</sup> Π(ν′) - (1) <sup>2</sup> Π(ν″) |           | (2) <sup>2</sup> Π <sub>1/2</sub> (ν′) - (2) <sup>2</sup> Σ <sup>+</sup> <sub>1/2</sub> (ν″) |          |
|--------|---------------------------------------------------------------|----------|-------------------------------------------------|-----------|----------------------------------------------------------------------------------------------|----------|
|        | ν′ = 0                                                        | 1        | ν′ = 0                                          | 1         | ν′ = 0                                                                                       | 1        |
| ν″ = 0 | 5.66(-2)                                                      | 2.72(-1) | 1.84(-22)                                       | 3.56(-20) | 3.69(-2)                                                                                     | 1.99(-1) |
| 1      | 1.10(-1)                                                      | 1.80(-1) | 3.26(-21)                                       | 6.01(-19) | 8.62(-2)                                                                                     | 1.93(-1) |
| 2      | 1.44(-1)                                                      | 7.16(-2) | 2.69(-20)                                       | 4.75(-18) | 1.26(-1)                                                                                     | 1.05(-1) |
| 3      | 1.52(-1)                                                      | 8.85(-3) | 1.40(-19)                                       | 2.39(-17) | 1.45(-1)                                                                                     | 2.83(-2) |
| 4      | 1.39(-1)                                                      | 2.79(-3) | 5.27(-19)                                       | 8.72(-17) | 1.43(-1)                                                                                     | 2.70(-4) |
| 5      | 1.16(-1)                                                      | 2.58(-2) | 1.52(-18)                                       | 2.45(-16) | 1.26(-1)                                                                                     | 1.15(-2) |
| 6      | 8.99(-2)                                                      | 5.21(-2) | 3.54(-18)                                       | 5.55(-16) | 1.02(-1)                                                                                     | 3.79(-2) |
| 7      | 6.54(-2)                                                      | 6.80(-2) | 7.09(-18)                                       | 1.08(-15) | 7.71(-2)                                                                                     | 6.04(-2) |
| 8      | 4.53(-2)                                                      | 7.12(-2) | 1.24(-17)                                       | 1.87(-15) | 5.52(-2)                                                                                     | 7.11(-2) |
| 9      | 3.01(-2)                                                      | 6.48(-2) | 2.17(-17)                                       | 3.22(-15) | 3.77(-2)                                                                                     | 7.03(-2) |
| 10     | 1.93(-2)                                                      | 5.35(-2) | 3.30(-17)                                       | 4.81(-15) | 2.48(-2)                                                                                     | 6.16(-2) |
| 11     | 1.20(-2)                                                      | 4.10(-2) | 4.85(-17)                                       | 6.97(-15) | 1.57(-2)                                                                                     | 4.95(-2) |
| 12     | 7.32(-3)                                                      | 2.97(-2) | 6.98(-17)                                       | 9.91(-15) | 9.69(-3)                                                                                     | 3.72(-2) |
| 13     | 4.35(-3)                                                      | 2.05(-2) | 9.17(-17)                                       | 1.28(-14) | 5.83(-3)                                                                                     | 2.65(-2) |
| 14     | 2.53(-3)                                                      | 1.36(-2) | 1.08(-16)                                       | 1.51(-14) | 3.49(-3)                                                                                     | 1.85(-2) |
| 15     | 1.44(-3)                                                      | 8.76(-3) | 1.20(-16)                                       | 1.65(-14) |                                                                                              |          |
| 16     | 8.15(-4)                                                      | 5.47(-3) | 1.31(-16)                                       | 1.79(-14) |                                                                                              |          |
| 17     | 4.52(-4)                                                      | 3.33(-3) | 1.34(-16)                                       | 1.82(-14) |                                                                                              |          |
| 18     | 2.48(-4)                                                      | 1.99(-3) | 1.31(-16)                                       | 1.77(-14) |                                                                                              |          |
| 19     | 1.34(-4)                                                      | 1.16(-3) | 1.32(-16)                                       | 1.78(-14) |                                                                                              |          |
| 20     | 7.22(-5)                                                      | 6.74(-4) | 1.32(-16)                                       | 1.77(-14) |                                                                                              |          |
| 21     | 3.84(-5)                                                      | 3.83(-4) | 1.30(-16)                                       | 1.73(-14) |                                                                                              |          |
| 22     | 2.03(-5)                                                      | 2.15(-4) | 1.23(-16)                                       | 1.64(-14) |                                                                                              |          |
| 23     | 1.06(-5)                                                      | 1.19(-4) | 1.12(-16)                                       | 1.49(-14) |                                                                                              |          |
| 24     | 5.55(-6)                                                      | 6.56(-5) | 9.97(-17)                                       | 1.31(-14) |                                                                                              |          |
| 25     | 2.87(-6)                                                      | 3.57(-5) |                                                 |           |                                                                                              |          |
| 26     | 1.48(-6)                                                      | 1.93(-5) |                                                 |           |                                                                                              |          |
| 27     | 7.62(-7)                                                      | 1.03(-5) |                                                 |           |                                                                                              |          |
| 28     | 3.90(-7)                                                      | 5.54(-6) |                                                 |           |                                                                                              |          |
| 29     | 1.99(-7)                                                      | 2.94(-6) |                                                 |           |                                                                                              |          |
| 30     | 1.01(-7)                                                      | 1.55(-6) |                                                 |           |                                                                                              |          |
| 31     | 5.17(-8)                                                      | 8.20(-7) |                                                 |           |                                                                                              |          |
| 32     | 2.62(-8)                                                      | 4.31(-7) |                                                 |           |                                                                                              |          |
| 33     | 1.33(-8)                                                      | 2.25(-7) |                                                 |           |                                                                                              |          |
| 34     | 6.77(-9)                                                      | 1.18(-7) |                                                 |           |                                                                                              |          |
| 35     | 3.43(-9)                                                      | 6.16(-8) |                                                 |           |                                                                                              |          |
| 36     | 1.74(-9)                                                      | 3.21(-8) |                                                 |           |                                                                                              |          |

|    |            |           |
|----|------------|-----------|
| 37 | 8.81(-10)  | 1.67(-8)  |
| 38 | 4.47(-10)  | 8.73(-9)  |
| 39 | 2.27(-10)  | 4.54(-9)  |
| 40 | 1.15(-10)  | 2.37(-9)  |
| 41 | 5.92(-11)  | 1.23(-9)  |
| 42 | 3.04(-11)  | 6.48(-10) |
| 43 | 1.57(-11)  | 3.40(-10) |
| 44 | 8.12(-12)  | 1.79(-10) |
| 45 | 4.20(-12)  | 9.47(-11) |
| 46 | 2.17(-12)  | 5.01(-11) |
| 47 | 1.12(-12)  | 2.66(-11) |
| 48 | 5.84(-13)  | 1.41(-11) |
| 49 | 3.03(-13)  | 7.55(-12) |
| 50 | 1.59(-13)  | 4.04(-12) |
| 51 | 8.46(-14)  | 2.17(-12) |
| 52 | 4.569(-14) | 1.18(-12) |
| 53 | 2.51(-14)  | 6.50(-13) |
| 54 | 1.41(-14)  | 3.63(-13) |
| 55 | 8.09(-15)  | 2.06(-13) |
| 56 | 4.71(-15)  | 1.19(-13) |

Note: Figures in parentheses for 10 to the power.
